# Supplementary material for: Argipressin for prevention of blood loss during liver resection: a study protocol for a randomised, placebo-controlled, double-blinded trial (ARG-01)
Source: HighWire-hosted journal article supplement (doi:10.1136/bmjopen-2023-073270), 2023-08-01
Supplement: bmjopen-2023-073270supp002_data_supplement.pdf [file bmjopen-2023-073270supp002_data_supplement.pdf]

|                                               |                                                                                                                                                                                                                                                                                                                                                                               |
|-----------------------------------------------|-------------------------------------------------------------------------------------------------------------------------------------------------------------------------------------------------------------------------------------------------------------------------------------------------------------------------------------------------------------------------------|
| Primary registry and trial identifying number | ClinicalTrials.gov; NTC05293041                                                                                                                                                                                                                                                                                                                                               |
| Date of registration in primary registry      | Nov 15, 2021                                                                                                                                                                                                                                                                                                                                                                  |
| Secondary identifying numbers                 | EudraCT 2021-001806-32                                                                                                                                                                                                                                                                                                                                                        |
| Source(s) of monetary or material support     | Department of Anaesthesia and Intensive Care, Sahlgrenska University Hospital. Gothenburg University, and the Sahlgrenska University Hospital (ALF-LUA), Gothenburg Medical Society (GLS-974156, GLS-961705), Sahlgrenska University Funds (SU-961353), Anna-Lisa Bror Björnsson Foundation, Tore Nilson's Foundation, The Foundation for Transplantation and Cancer Research |
| Primary sponsor                               | Region Vastra Gotaland,                                                                                                                                                                                                                                                                                                                                                       |
| Secondary sponsor(s)                          | Kristina Tempelman Svennerholm                                                                                                                                                                                                                                                                                                                                                |
| Contact for public queries                    | Ellinor Wisén, MD, +46 702457661<br>ellinor.wisen@vgregion.se                                                                                                                                                                                                                                                                                                                 |
| Contact for scientific queries                | Kristina Tempelman Svennerholm<br>+46 708117993<br>kristina.svennerholm@vgregion.se                                                                                                                                                                                                                                                                                           |
| Public title                                  | Argipressin for prevention of blood loss during liver resection                                                                                                                                                                                                                                                                                                               |
| Scientific title                              | Influence of Argipressin on blood loss during hepatic resection; a double-blinded, randomized placebo-controlled trial.                                                                                                                                                                                                                                                       |
| Countries of recruitment                      | Sweden                                                                                                                                                                                                                                                                                                                                                                        |
| Health condition(s) or problem(s) studied     | Hepatic resection, colorectal cancer, hepatocellular cancer, gallbladder cancer, Klatskin tumour, liver metastasis, inflammation, transfusion                                                                                                                                                                                                                                 |
| Intervention(s)                               | Active comparator: Empressin® 0.8 U/ml, 0.045 U/kg/h (0.056 ml/kg/h)<br>Placebo comparator: Normal Saline (NaCl 9 mg/ml)                                                                                                                                                                                                                                                      |
| Key inclusion and exclusion criteria          | <i>Ages eligible for study:</i> ≥18 years<br><i>Sexes eligible for study:</i> both<br><i>Accepts healthy volunteers:</i> No<br><i>Inclusion criteria:</i> patient ≥18 years, ASA class I-III, scheduled for open or                                                                                                                                                           |

|                                              |                                                                                                                                                                                                                                                                                                                                                                                                                                                                                                                                                                                                                                                                                                                                                                                                                                                                                                                                                                                                                                                                                                                                                     |
|----------------------------------------------|-----------------------------------------------------------------------------------------------------------------------------------------------------------------------------------------------------------------------------------------------------------------------------------------------------------------------------------------------------------------------------------------------------------------------------------------------------------------------------------------------------------------------------------------------------------------------------------------------------------------------------------------------------------------------------------------------------------------------------------------------------------------------------------------------------------------------------------------------------------------------------------------------------------------------------------------------------------------------------------------------------------------------------------------------------------------------------------------------------------------------------------------------------|
|                                              | <p>laparoscopic hepatic resection, signed informed consent</p> <p><i>Exclusion criteria:</i></p> <ul style="list-style-type: none"> <li>-Participant does not understand the given information, and/ or cannot give written informed consent.</li> <li>-Simultaneous operation of tumor with other localization, or surgery for superficial single hepatic tumor less than 2 cm, expected to be of short duration and with minimal blood loss.</li> <li>-Terminal kidney failure (estimated preoperative GFR &lt; 15 ml/min).</li> <li>Pregnancy or lactation.</li> <li>-Known allergy to Empressin®.</li> <li>-Patient included in other interventional study, interacting with the endpoints in the present study, or previous randomization in this study.</li> <li>-Hyponatremia (S-Na &lt; 130 mmol/L)</li> <li>-Patient considered ineligible for other surgical or medical reason.</li> <li>-Present infection.</li> </ul> <p>Patients with systemic inflammatory disease, inflammatory bowel disease or preoperative corticosteroid treatment will not be eligible for the subgroups where cytokines and interleukins are investigated.</p> |
| Study type                                   | <p>Interventional</p> <p>Allocation: randomized</p> <p>Intervention model: 2 parallel arms</p> <p>Masking: Double blinded (subject, caregiver, investigator, outcomes assessor)</p> <p>Primary purpose: morbidity reduction</p> <p>Phase: IV</p>                                                                                                                                                                                                                                                                                                                                                                                                                                                                                                                                                                                                                                                                                                                                                                                                                                                                                                    |
| Date of first enrolment                      | March, 2022                                                                                                                                                                                                                                                                                                                                                                                                                                                                                                                                                                                                                                                                                                                                                                                                                                                                                                                                                                                                                                                                                                                                         |
| Target sample size                           | 248 patients                                                                                                                                                                                                                                                                                                                                                                                                                                                                                                                                                                                                                                                                                                                                                                                                                                                                                                                                                                                                                                                                                                                                        |
| Recruitment status                           | recruiting                                                                                                                                                                                                                                                                                                                                                                                                                                                                                                                                                                                                                                                                                                                                                                                                                                                                                                                                                                                                                                                                                                                                          |
| Primary outcome(s)<br>Key secondary outcomes | <p><i>Primary outcome:</i> Blood loss (ml) at the end of surgery</p> <p><i>Secondary outcomes:</i><br/>Transfusion needs during surgery and postoperative day 1, 2 (laparoscopic surgery) or 5 (open surgery).</p>                                                                                                                                                                                                                                                                                                                                                                                                                                                                                                                                                                                                                                                                                                                                                                                                                                                                                                                                  |

|  |                                                                                             |
|--|---------------------------------------------------------------------------------------------|
|  | Laboratory inflammatory response after hepatic resection.<br>Change in organ damage markers |
|  |                                                                                             |
|  |                                                                                             |
|  |                                                                                             |
